# Supplementary material for: Enhanced Photovoltaic Properties of Dye-Sensitized Solar Cells through Ammonium Hydroxide-Modified (Nitrogen-Doped) Titania Photoanodes
Source: Hindawi journal article supplement (doi:10.1155/2023/1090174), 2023-02-03
Supplement: f1 [file 1090174.f1.docx]

**Supporting information**


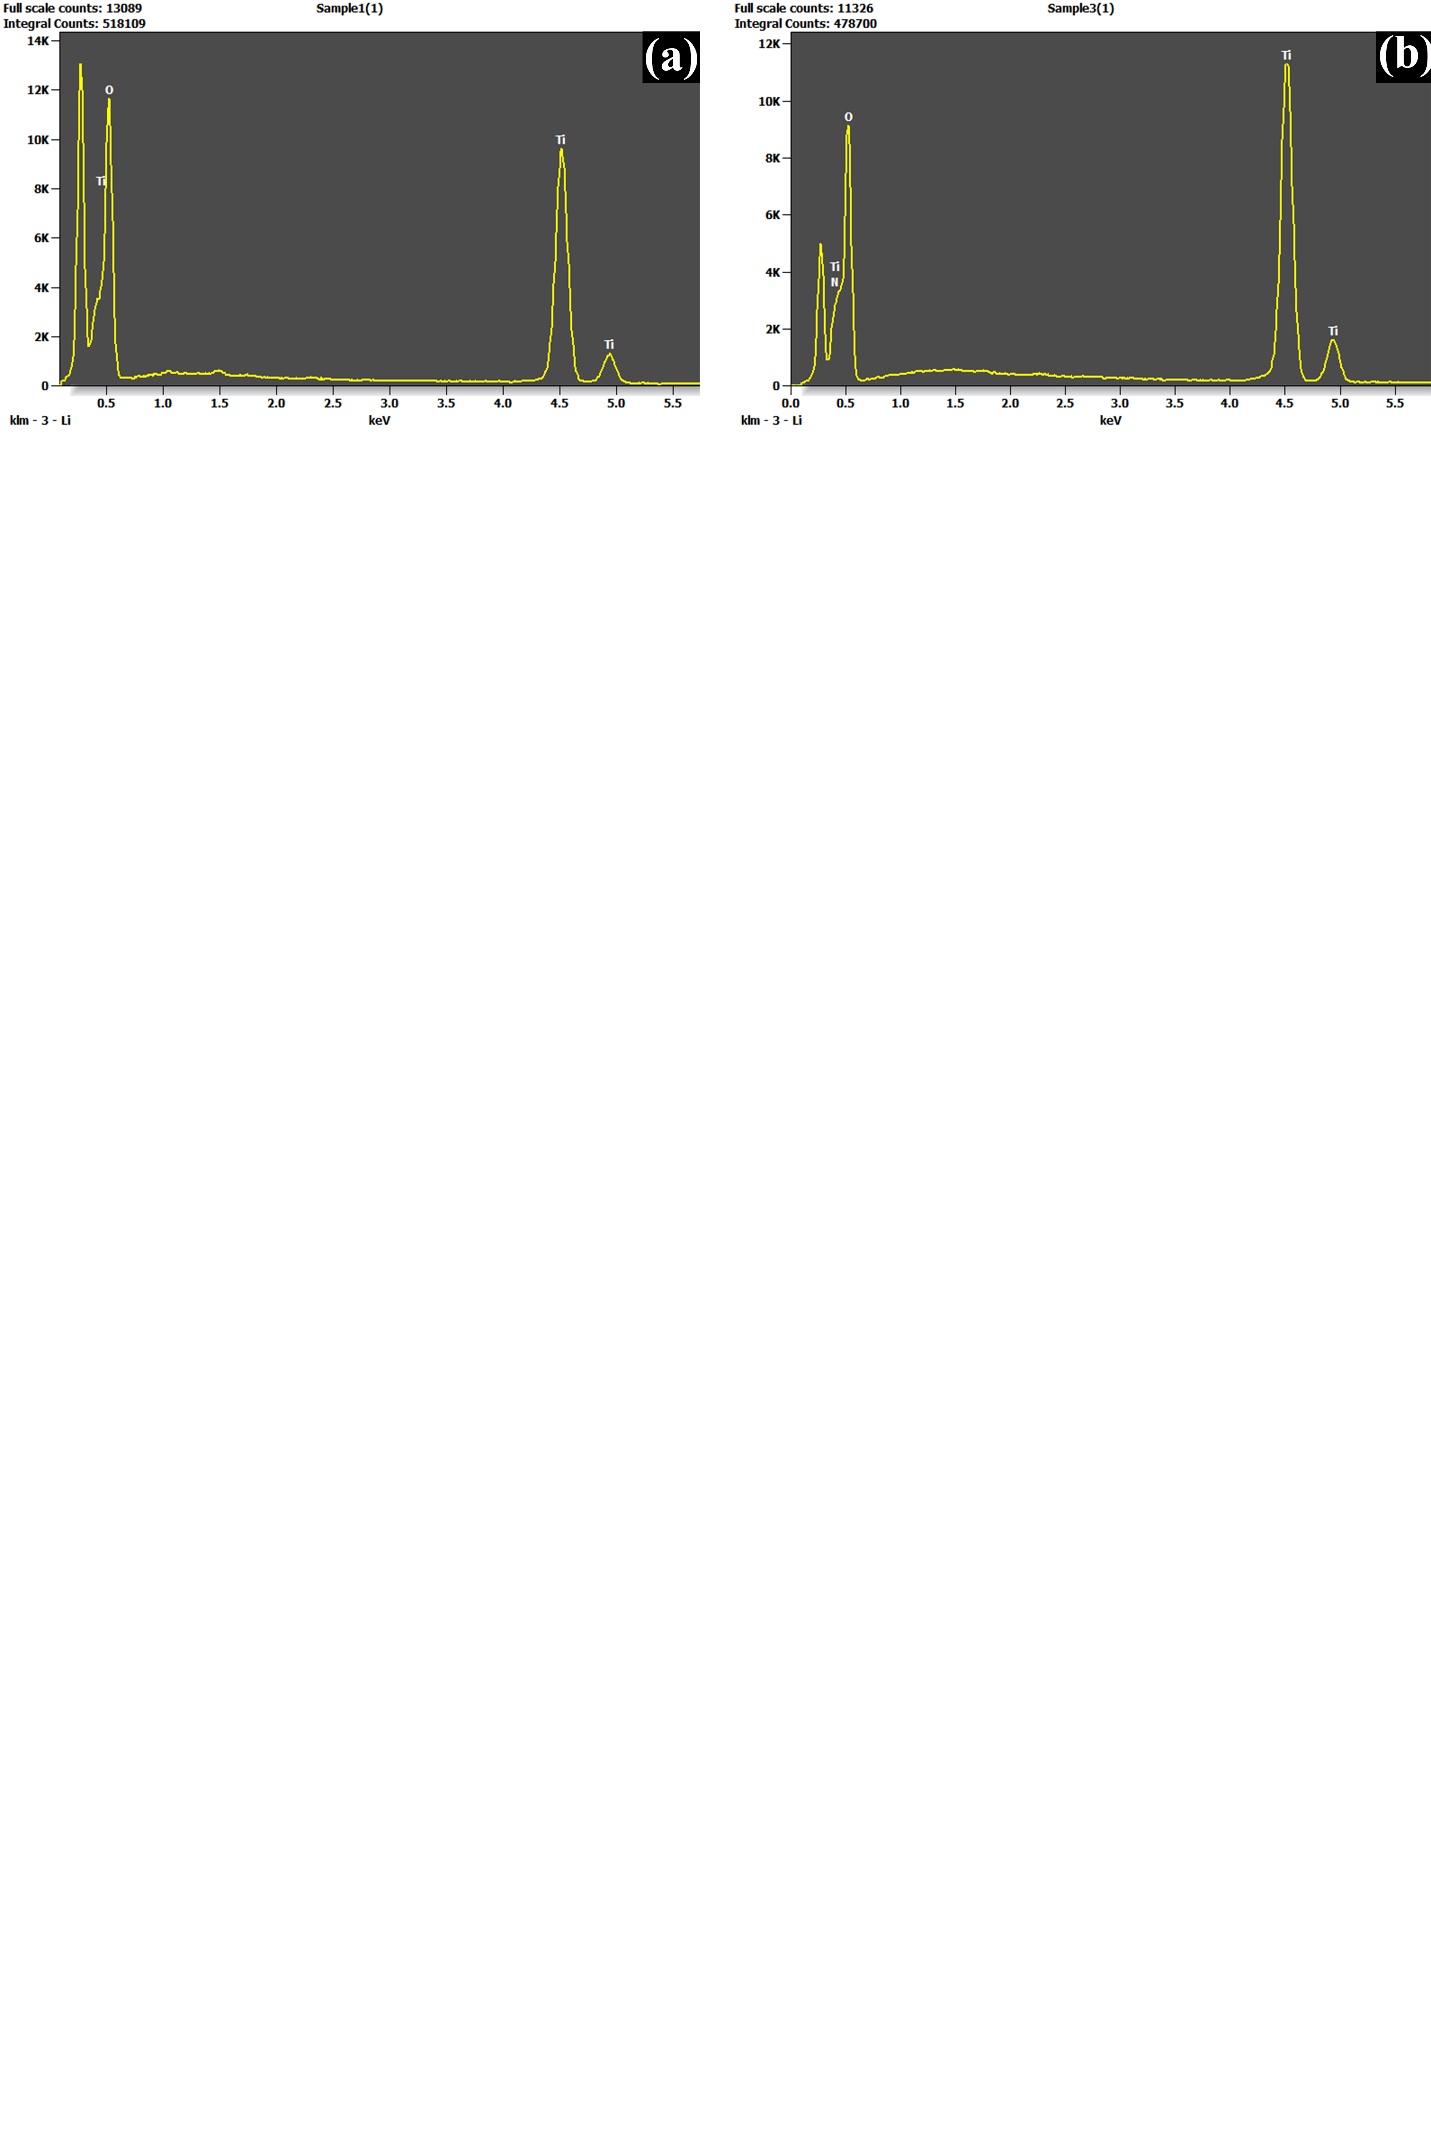


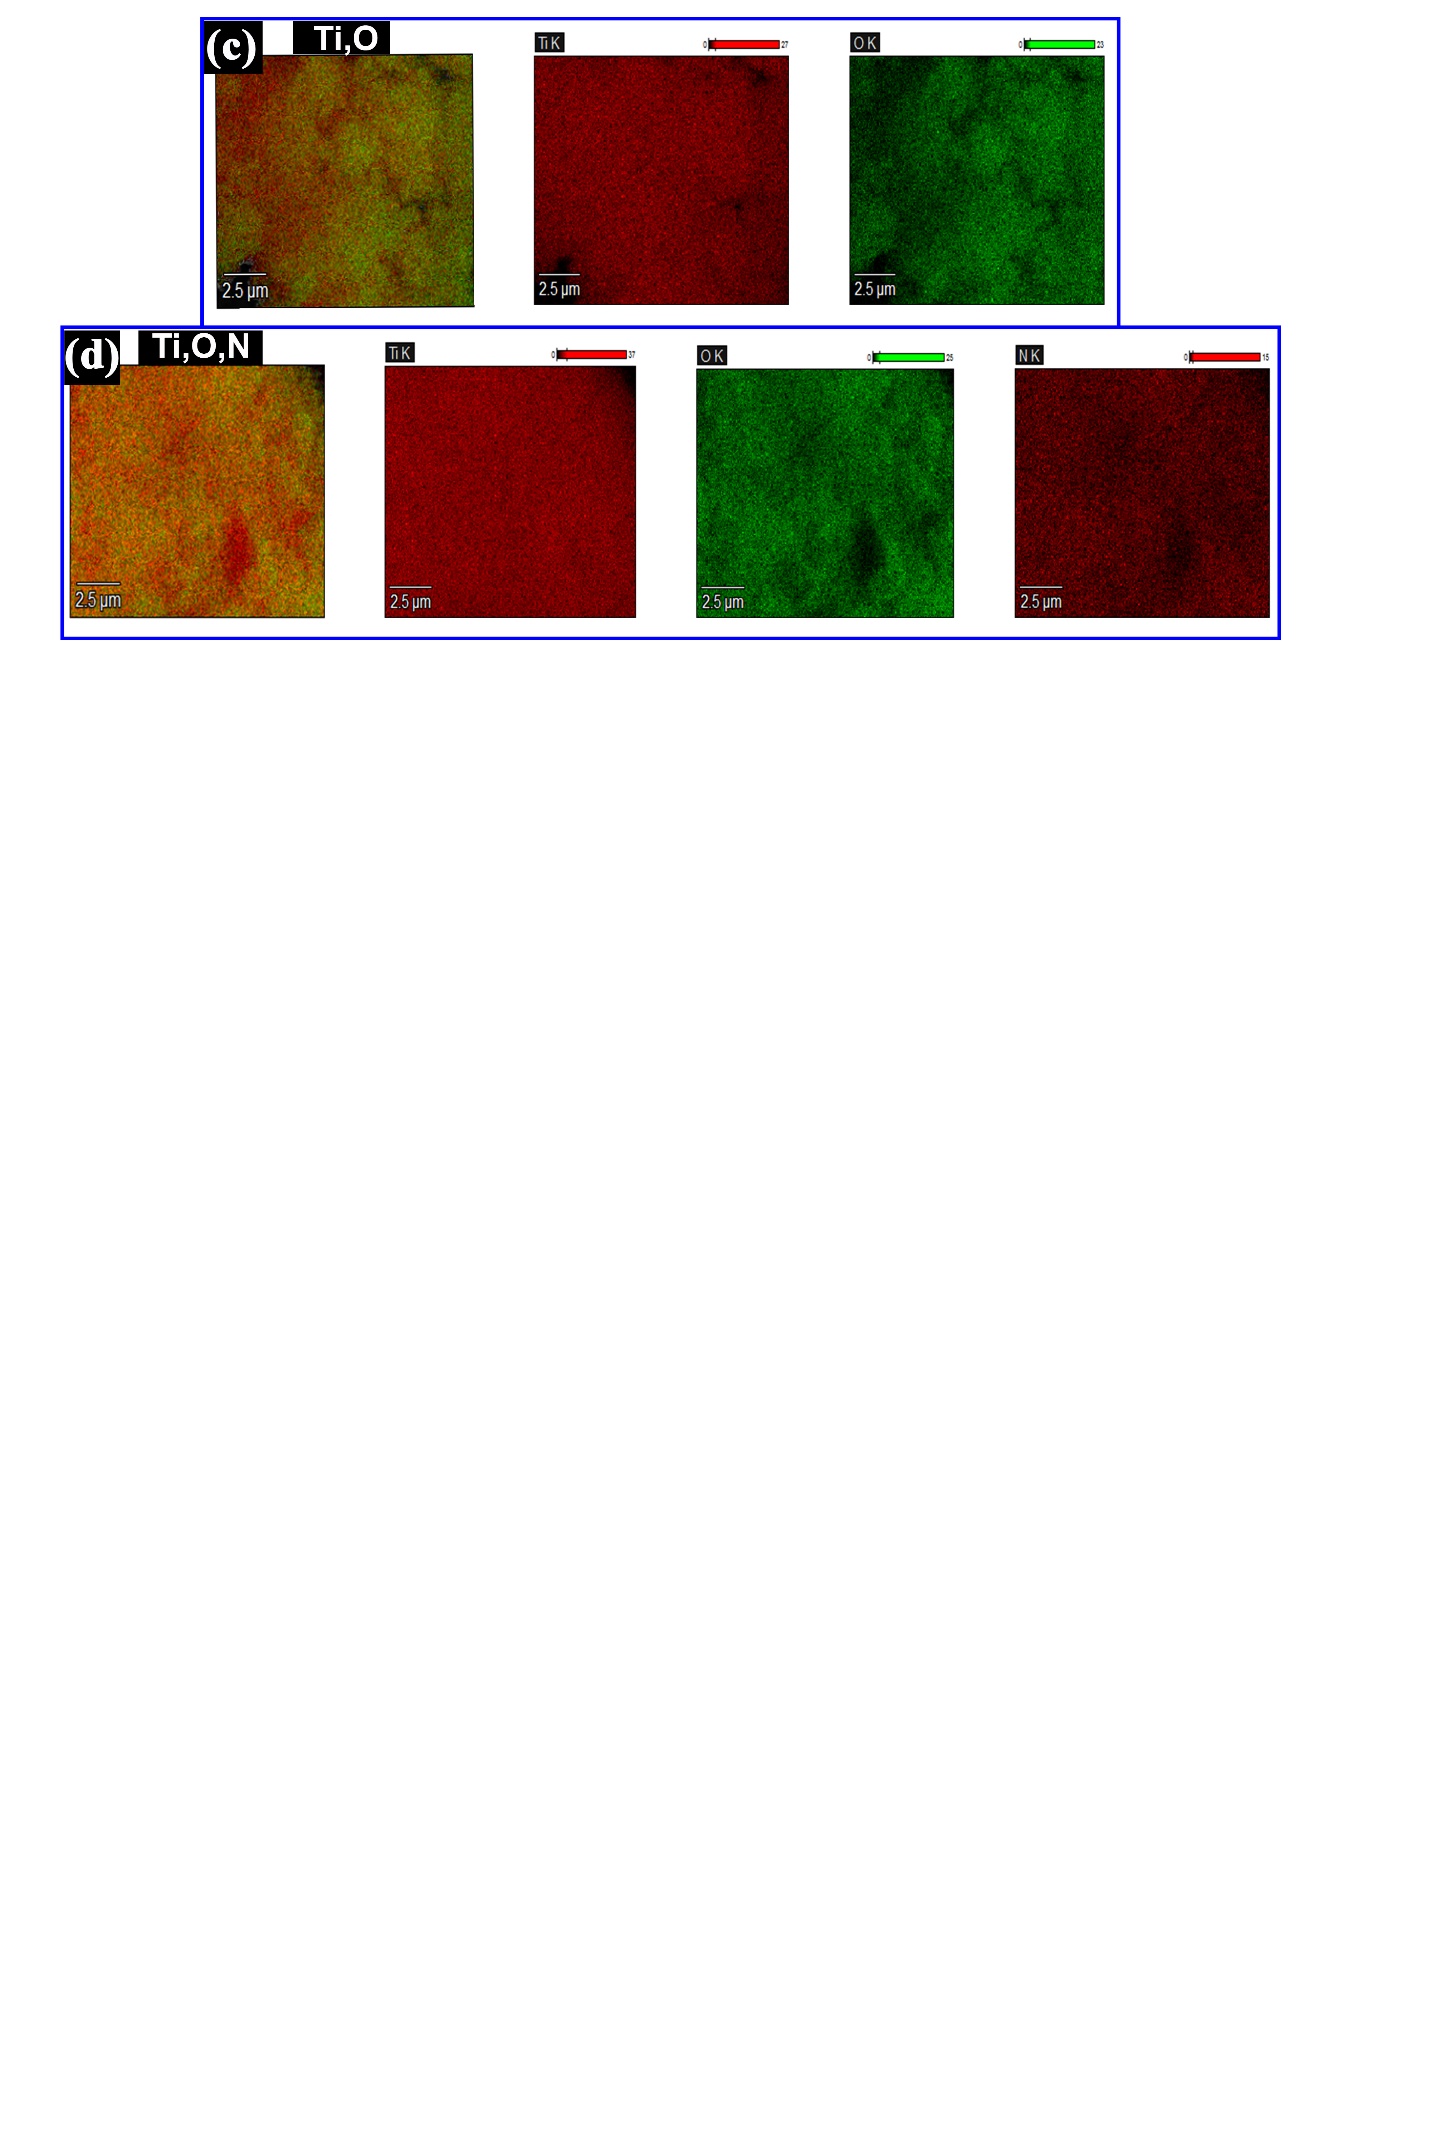


Figure S1: EDX spectra of (a) pure TiO2 and (b) 20N-TiO2; EDX mapping of (c) pure TiO2 and (d) 20N-TiO2

*Table S1:* *Weight percentage of pure TiO2 and 20N-TiO2 in terms of Energy dispersive X-ray spectroscopic investigation*

| **Nanoparticle** | **Ti (wt.%)** | **O (wt.%)** | **N (wt.%)** |
| --- | --- | --- | --- |
| Pure TiO2 | 44.36 | 55.64 | - |
| 20N-TiO2 | 46.92 | 47.71 | 5.37 |


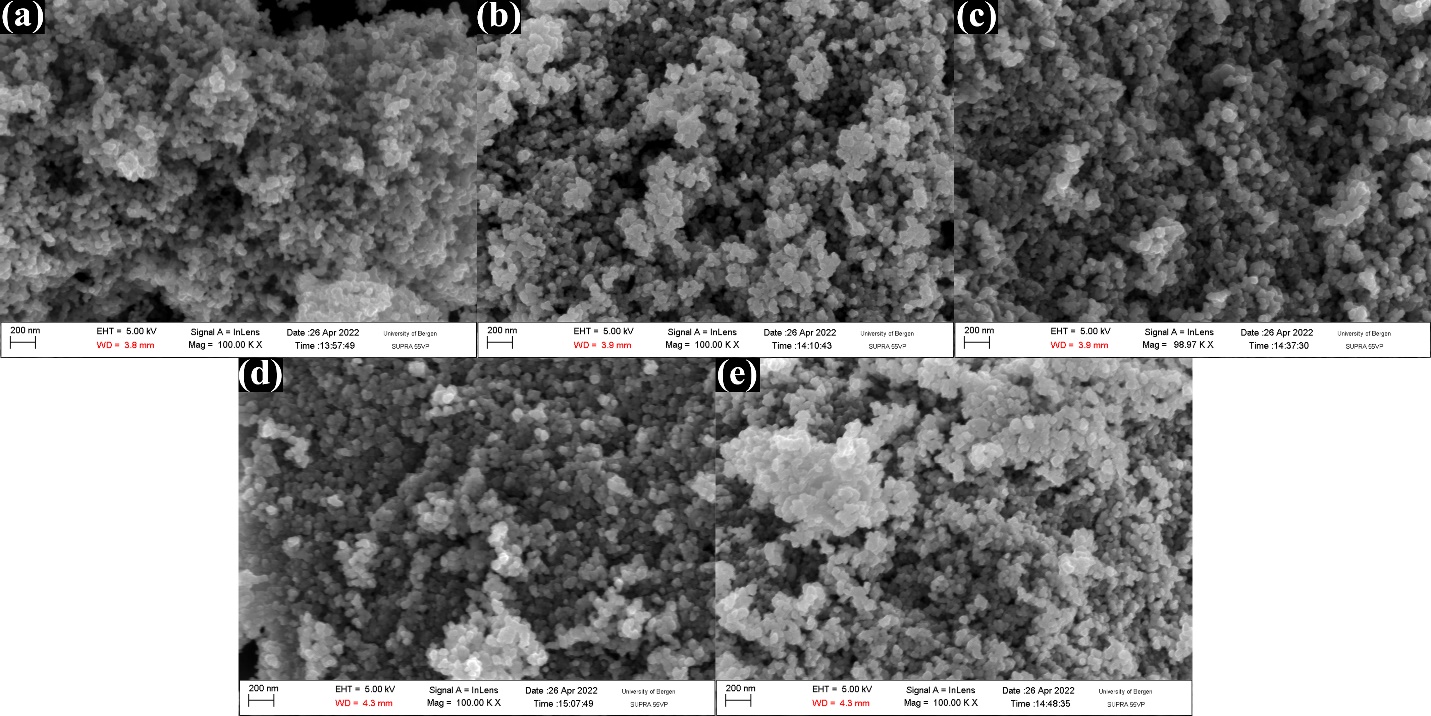


Figure S2: SEM images of (a) pure TiO2, (b-e) 10N-TiO2, 20N- TiO2, 30N-TiO2 and 40N-TiO2 nanoparticles
